# Supplementary material for: Genome-Wide Interaction-Based Association Analysis Identified Multiple New Susceptibility Loci for Common Diseases
Source: PLOS journal article supplement (doi:10.1371/journal.pgen.1001338), 2011-03-17
Supplement: S9 (10.1371/journal.pgen.1001338.s009) [file journal.pgen.1001338.s009]

**Table S4. OR tables for the interaction between rs296533 and rs2089509 with the IBDGC non-Jewish population, Jewish population, and the imputed WTCCC data**

| IBDGC non-Jewish |  | rs2089509 | | |
| --- | --- | --- | --- | --- |
| rs296533 | GG | GA | AA |
| OR | GG | 1 | 0.688(0.465,1.018) | 0.603(0.345,1.053) |
| GT | 0.937(0.634,1.385) | 0.693(0.467,1.030) | 0.549(0.297,1.012) |
| TT | 0.187(0.082,0.425) | 0.567(0.315,1.018) | 0.873(0.284,2.684) |
| OR1 | GG | 1 | 0.688(0.465,1.018) | 0.603(0.345,1.053) |
| GT | 1 | 0.740(0.494,1.107) | 0.585(0.315,1.086) |
| TT | 1 | 3.030(1.192,7.703) | 4.667(1.225,17.780) |
| OR2 | GG | 1 | 1 | 1 |
| GT | 0.937(0.634,1.385) | 1.008(0.673,1.510) | 0.910(0.436,1.901) |
| TT | 0.187(0.082,0.425) | 0.823(0.456,1.488) | 1.448(0.438,4.785) |
|  |  |  |  |  |
| IBDGC Jewish |  | rs2089509 | | |
| rs296533 | GG | GA | AA |
| OR | GG | 1 | 0.804(0.516,1.254) | 0.581(0.275,1.225) |
| GT | 0.797(0.517,1.227) | 0.674(0.428,1.061) | 0.633(0.297,1.349) |
| TT | 0.615(0.262,1.445) | 1.056(0.429,2.597) | 0.697(0.162,2.994) |
| OR1 | GG | 1 | 0.804(0.516,1.254) | 0.581(0.275,1.225) |
| GT | 1 | 0.846(0.519,1.379) | 0.795(0.365,1.730) |
| TT | 1 | 1.717(0.529,5.574) | 1.133(0.219,5.864) |
| OR2 | GG | 1 | 1 | 1 |
| GT | 0.797(0.517,1.227) | 0.838(0.509,1.381) | 1.091(0.406,2.928) |
| TT | 0.615(0.262,1.445) | 1.313(0.521,3.308) | 1.200(0.245,5.886) |
|  |  |  |  |  |
| WTCCC (Imputed) |  | rs2089509 | | |
| rs296533 | GG | GA | AA |
| OR | GG | 1 | 0.661(0.538,0.813) | 0.875(0.640,1.196) |
| GT | 0.867(0.720,1.045) | 0.665(0.549,0.806) | 0.799(0.601,1.061) |
| TT | 0.626(0.472,0.829) | 0.825(0.632,1.078) | 0.659(0.416,1.043) |
| OR1 | GG | 1 | 0.661(0.538,0.813) | 0.875(0.640,1.196) |
| GT | 1 | 0.767(0.638,0.922) | 0.920(0.697,1.216) |
| TT | 1 | 1.319(0.943,1.846) | 1.053(0.637,1.740) |
| OR2 | GG | 1 | 1 | 1 |
| GT | 0.867(0.720,1.045) | 1.005(0.820,1.233) | 0.913(0.627,1.328) |
| TT | 0.626(0.472,0.829) | 1.248(0.947,1.644) | 0.753(0.447,1.267) |
